# Supplementary material for: Maternal depletion of CTCF reveals multiple functions during oocyte and preimplantation embryo development
Source: Oxford University Press journal article supplement (doi:10.1242/dev.024539), 2008-07-10
Supplement: dev024539tables1.pdf [file dev024539tables1.pdf]

**Table S1. Transcripts misregulated by more than twofold**

| Gene symbol                     | UniGene   | GenBank   | Probeset ID* | Ntg raw value | Tg raw value | Tg/Ntg ratio |
|---------------------------------|-----------|-----------|--------------|---------------|--------------|--------------|
| 1110001J03Rik                   | Mm.158971 | NM_025363 | 1416367_at   | 219           | 78           | 0.34         |
| 1110006O24Rik                   | Mm.133063 | NM_021417 | 1420750_at   | 54            | 27           | 0.46         |
| 1110032A04Rik                   | Mm.45481  | AF365876  | 1417802_at   | 44            | 21           | 0.42         |
| 1110032A04Rik                   | Mm.45481  | AF365876  | 1417803_at   | 211           | 94           | 0.47         |
| 1110035H17Rik                   |           | AI450336  | 1453827_at   | 19            | 8            | 0.43         |
| 1110059M19Rik                   | Mm.336041 | AV015858  | 1429135_at   | 77            | 36           | 0.49         |
| 1110065P19Rik;<br>2310040A07Rik |           | BB772205  | 1452893_s_at | 11            | 36           | <b>3.31</b>  |
| 1700021F05Rik                   | Mm.209953 | BC013506  | 1421019_at   | 542           | 180          | 0.33         |
| 1700021F07Rik                   | Mm.46132  | AK006200  | 1429803_at   | 296           | 903          | <b>3.04</b>  |
| 1700023E05Rik                   | Mm.151092 | AI848394  | 1447439_at   | 300           | 136          | 0.43         |
| 1700029I01Rik                   | Mm.276881 | BQ033755  | 1436574_at   | 13            | 5            | 0.42         |
| 1700040D17Rik                   | Mm.87305  | AV260432  | 1439559_at   | 41            | 18           | 0.37         |
| 1700086P04Rik                   |           | AK007024  | 1453479_at   | 69            | 30           | 0.44         |
| 1700113I22Rik                   | Mm.435537 | AK007198  | 1432073_at   | 453           | 1096         | <b>2.44</b>  |
| 1700129L04Rik                   | Mm.159041 | NM_028588 | 1450328_at   | 12            | 5            | 0.33         |
| 1810012P15Rik                   | Mm.258932 | AW108427  | 1436548_at   | 20            | 7            | 0.40         |
| 1810012P15Rik                   | Mm.258932 | BM250236  | 1440234_at   | 18            | 9            | 0.47         |
| 1810020D17Rik                   | Mm.41583  | BC026557  | 1451381_at   | 121           | 40           | 0.32         |
| 1810034K20Rik                   | Mm.24601  | AK007694  | 1428337_at   | 22            | 8            | 0.35         |
| 1810034K20Rik                   | Mm.24601  | NM_023397 | 1450067_a_at | 22            | 3            | 0.08         |
| 1810046K07Rik                   | Mm.75315  | AK007796  | 1453547_at   | 23            | 48           | <b>2.09</b>  |
| 2200001I15Rik                   | Mm.27156  | AA162958  | 1437019_at   | 122           | 56           | 0.45         |
| 2210013K02Rik                   | Mm.11112  | AK008721  | 1431284_a_at | 38            | 13           | 0.33         |
| 2210418O10Rik                   | Mm.229100 | NM_029813 | 1449910_at   | 3             | 7            | <b>2.25</b>  |
| 2310030B04Rik                   |           | BB144669  | 1438849_at   | 19            | 50           | <b>2.57</b>  |
| 2310040A07Rik                   |           | BB772205  | 1428739_at   | 19            | 79           | <b>4.11</b>  |
| 2310066E14Rik                   | Mm.41261  | BC006820  | 1424239_at   | 114           | 54           | 0.48         |
| 2610002M06Rik                   | Mm.37274  | NM_025921 | 1419690_at   | 50            | 14           | 0.26         |
| 2610005L07Rik;<br>LOC546041     | Mm.359054 | BB471300  | 1437717_x_at | 16            | 9            | 0.39         |
| 2810004I08Rik                   |           | BB825508  | 1453534_at   | 20            | 39           | <b>2.08</b>  |
| 2810043G22Rik                   | Mm.242211 | AK012899  | 1430934_at   | 88            | 32           | 0.36         |
| 3110057O12Rik                   | Mm.32373  | AW061107  | 1429966_at   | 13            | 6            | 0.45         |
| 3222402P14Rik                   | Mm.335386 | BF140684  | 1437869_at   | 7             | 14           | <b>2.00</b>  |
| 4632404H12Rik                   | Mm.386816 | BB216617  | 1438209_at   | 32            | 16           | 0.48         |
| 4632432E15Rik                   |           | AK014604  | 1432885_at   | 33            | 203          | <b>5.72</b>  |
| 4733401H18Rik                   | Mm.29471  | NM_023247 | 1418185_at   | 306           | 113          | 0.38         |
| 4921517B04Rik                   | Mm.379187 | BB795572  | 1455377_at   | 18            | 9            | 0.48         |
| 4921517N04Rik                   | Mm.276415 | AW488266  | 1429121_at   | 26            | 11           | 0.37         |
| 4930435F18Rik                   |           | AK015323  | 1431547_at   | 37            | 19           | 0.48         |
| 4930570C03Rik                   | Mm.28955  | BC022913  | 1450409_a_at | 93            | 29           | 0.32         |
| 4930570C03Rik                   | Mm.28955  | BC022913  | 1450410_a_at | 96            | 31           | 0.33         |
| 4930583I09Rik                   | Mm.109380 | AK019827  | 1431669_at   | 44            | 14           | 0.33         |
| 4932443J21Rik                   |           | AV253967  | 1437272_at   | 9             | 4            | 0.34         |
| 4933404K13Rik                   |           | AK016653  | 1454567_at   | 13            | 7            | 0.45         |
| 4933426D04Rik                   |           | AK016926  | 1432407_at   | 18            | 36           | <b>2.01</b>  |
| 5133401H06Rik                   |           | AK017223  | 1428663_at   | 10            | 3            | 0.36         |
| 5530401J07Rik                   |           | AK017436  | 1428796_at   | 14            | 7            | 0.49         |
| 5830443L24Rik                   | Mm.425261 | NM_029509 | 1418776_at   | 15            | 8            | 0.48         |
| 6430550H21Rik                   | Mm.72979  | BB520013  | 1436948_a_at | 54            | 27           | 0.45         |
| 8030451N04Rik                   |           | BB400432  | 1455189_at   | 6             | 11           | <b>2.02</b>  |
| 8430408J07Rik                   |           | AK018397  | 1453078_at   | 25            | 6            | 0.24         |
| 9530056K15Rik                   | Mm.188979 | BB125017  | 1457523_at   | 23            | 8            | 0.29         |
| 9830115L13Rik                   |           | BB757349  | 1436183_at   | 44            | 17           | 0.36         |
| 9930012K11Rik                   | Mm.12148  | AV223039  | 1433801_at   | 144           | 297          | <b>2.05</b>  |
| A130022J15Rik                   | Mm.251789 | BI149851  | 1433671_at   | 33            | 9            | 0.29         |
| A130022J15Rik                   | Mm.251789 | BI149851  | 1454678_s_at | 74            | 17           | 0.25         |

|               |           |           |              |      |     |      |
|---------------|-----------|-----------|--------------|------|-----|------|
| A330033J07Rik |           | BG067329  | 1458799_at   | 14   | 8   | 0.47 |
| A330102K23Rik | Mm.102025 | BG065199  | 1455516_at   | 64   | 33  | 0.48 |
| A830058L05Rik | Mm.33443  | BB271764  | 1457566_at   | 34   | 7   | 0.19 |
| Abca9         | Mm.291459 | AW046072  | 1440879_at   | 74   | 31  | 0.42 |
| Ablim3        | Mm.329478 | BM900139  | 1434013_at   | 119  | 34  | 0.29 |
| Adprhl2       | Mm.11285  | BC023177  | 1427449_a_at | 40   | 20  | 0.50 |
| Al452195      |           | BB303582  | 1435280_at   | 22   | 10  | 0.43 |
| Al481121      |           | BB498095  | 1456123_at   | 59   | 29  | 0.49 |
| Akr1b8        | Mm.5378   | NM_008012 | 1448894_at   | 645  | 106 | 0.17 |
| Alk           | Mm.311854 | NM_007439 | 1449987_at   | 99   | 36  | 0.38 |
| Aof2          | Mm.28540  | AK007763  | 1426761_at   | 108  | 50  | 0.45 |
| Aof2          | Mm.28540  | AK007763  | 1426762_s_at | 474  | 202 | 0.43 |
| Apba2         | Mm.4657   | BE952331  | 1427288_at   | 43   | 3   | 0.08 |
| Arl2          | Mm.21071  | NM_019722 | 1422549_at   | 698  | 310 | 0.44 |
| Art1          | Mm.261071 | U31510    | 1451372_a_at | 32   | 12  | 0.37 |
| Asb12         | Mm.79122  | NM_080858 | 1420346_at   | 67   | 23  | 0.34 |
| Atn1          | Mm.333380 | NM_007881 | 1421149_a_at | 26   | 64  | 2.41 |
| Atp4a         | Mm.12821  | NM_018731 | 1421286_a_at | 18   | 38  | 2.13 |
| AU018091      | Mm.268551 | AV099404  | 1435154_at   | 204  | 90  | 0.45 |
| AU019176      |           | BM228311  | 1456179_at   | 52   | 20  | 0.39 |
| AW049604      | Mm.244319 | BB804965  | 1419490_at   | 31   | 10  | 0.26 |
| AW551984      | Mm.208855 | AV220682  | 1433434_at   | 33   | 17  | 0.47 |
| B230112P13Rik |           | BQ175636  | 1439633_at   | 94   | 41  | 0.43 |
| B230120H23Rik | Mm.314618 | BB454974  | 1435029_at   | 59   | 19  | 0.29 |
| B230396O12Rik | Mm.72944  | AV274423  | 1446123_at   | 370  | 927 | 2.45 |
| B3gnt1        | Mm.29628  | AV032053  | 1452346_at   | 137  | 64  | 0.48 |
| Bai1          | Mm.43133  | BG261923  | 1455363_at   | 36   | 14  | 0.39 |
| Basp1         | Mm.29586  | AK011545  | 1428572_at   | 109  | 222 | 2.05 |
| BB182387      |           | AV269187  | 1438885_at   | 2    | 9   | 5.89 |
| BC013672      | Mm.275233 | BC013672  | 1451777_at   | 44   | 19  | 0.46 |
| BC037703      | Mm.32900  | AV231983  | 1455241_at   | 64   | 15  | 0.24 |
| BC067068      | Mm.250875 | BB811762  | 1434749_at   | 84   | 166 | 2.02 |
| Bgn           | Mm.2608   | BC019502  | 1448323_a_at | 39   | 20  | 0.49 |
| Bmp7          | Mm.595    | NM_007557 | 1418910_at   | 11   | 33  | 2.82 |
| Bsn           | Mm.437679 | BQ176524  | 1436123_at   | 9    | 32  | 3.73 |
| Bsn           | Mm.437679 | AV139249  | 1450467_at   | 21   | 51  | 2.50 |
| C030044B11Rik |           | AK021143  | 1429264_at   | 84   | 43  | 0.48 |
| C1qbp         | Mm.30049  | AV108824  | 1455821_x_at | 2027 | 906 | 0.44 |
| C330008K14Rik | Mm.30649  | BE985366  | 1436194_at   | 56   | 28  | 0.48 |
| Cacnb2        | Mm.313930 | BG069383  | 1444693_at   | 17   | 7   | 0.39 |
| Cacnb2        | Mm.313930 | W41214    | 1452476_at   | 32   | 15  | 0.48 |
| Cacnb2        | Mm.313930 | BB078175  | 1456401_at   | 173  | 78  | 0.45 |
| Capn1         | Mm.6221   | AF084459  | 1417228_at   | 41   | 18  | 0.45 |
| Ccdc5         | Mm.39293  | BC024400  | 1424955_at   | 408  | 202 | 0.48 |
| Ccl2          | Mm.290320 | AF065933  | 1420380_at   | 13   | 63  | 5.18 |
| Cd163         | Mm.37426  | NM_053094 | 1419144_at   | 8    | 3   | 0.19 |
| Cd1d1         | Mm.1894   | NM_007639 | 1449130_at   | 123  | 45  | 0.36 |
| Cd200         | Mm.245851 | AF004023  | 1448788_at   | 205  | 107 | 0.50 |
| Cd200r3       | Mm.297337 | BB749845  | 1453813_at   | 10   | 22  | 2.06 |
| Cd24a         | Mm.29742  | NM_009846 | 1448182_a_at | 2    | 8   | 4.14 |
| Chrdl1        | Mm.157697 | AV144145  | 1434201_at   | 19   | 6   | 0.32 |
| Clic3         | Mm.44194  | AK009020  | 1429574_at   | 16   | 37  | 2.53 |
| Clps          | Mm.21160  | AV076302  | 1438612_a_at | 12   | 2   | 0.23 |
| Cnga1         | Mm.436652 | U19717    | 1451763_at   | 46   | 21  | 0.44 |
| Crip2         | Mm.133825 | NM_024223 | 1417311_at   | 134  | 61  | 0.46 |
| Ctcf          | Mm.269474 | BB836888  | 1418330_at   | 766  | 21  | 0.03 |
| Ctcf          | Mm.269474 | BB836888  | 1449042_at   | 1001 | 36  | 0.04 |
| Cttnbp2       | Mm.224189 | BB357580  | 1435435_at   | 63   | 28  | 0.48 |
| Cubn          | Mm.313915 | AF197159  | 1426990_at   | 11   | 5   | 0.40 |
| Cubn          | Mm.313915 | AF197159  | 1452270_s_at | 27   | 13  | 0.49 |

|               |                        |           |              |     |      |              |
|---------------|------------------------|-----------|--------------|-----|------|--------------|
| Cxcl14        | Mm.30211               | AF252873  | 1418457_at   | 29  | 72   | <b>2.42</b>  |
| Cxcr4         | Mm.1401                | D87747    | 1448710_at   | 7   | 48   | <b>6.24</b>  |
| Cyb561d1      | Mm.246391              | BB016212  | 1459837_at   | 18  | 9    | 0.46         |
| Cyp51         | Mm.140158              | NM_020010 | 1422533_at   | 8   | 16   | <b>2.02</b>  |
| D430042O09Rik | Mm.274389              | BB487579  | 1443334_at   | 46  | 99   | <b>2.19</b>  |
| Dach2         | Mm.79760               | NM_033605 | 1449823_at   | 37  | 13   | 0.33         |
| Dbil5         | Mm.347413              | AK006528  | 1421865_at   | 5   | 21   | <b>3.99</b>  |
| Dbt           | Mm.3636                | NM_010022 | 1449118_at   | 55  | 22   | 0.39         |
| Dclk3         | Mm.26361               | BB326709  | 1436532_at   | 162 | 57   | 0.38         |
| Ddit4l        | Mm.250841              | AF335325  | 1451751_at   | 3   | 11   | <b>3.19</b>  |
| Dennd4b       | Mm.30571               | BC026996  | 1427014_at   | 50  | 17   | 0.34         |
| Dnajc5g       | Mm.189696              | BB667162  | 1437814_at   | 59  | 24   | 0.42         |
| Dscr6         | Mm.42604               | NM_133229 | 1420459_at   | 8   | 16   | <b>2.09</b>  |
| Dtd1          | Mm.28109               | AI451865  | 1451040_at   | 77  | 506  | <b>6.56</b>  |
| Dtx3l         | Mm.390852              | AV327407  | 1435208_at   | 100 | 51   | 0.48         |
| Dtx3l         | Mm.390852              | BB705351  | 1439825_at   | 37  | 18   | 0.44         |
| Dync1i1       | Mm.20893               | NM_010063 | 1416361_a_at | 92  | 44   | 0.47         |
| E130311K13Rik | Mm.39342               | BB754259  | 1439531_at   | 149 | 51   | 0.36         |
| E430004N04Rik | Mm.123021              | BB201286  | 1439719_at   | 38  | 20   | 0.49         |
| Efh1          | Mm.247951              | BC019531  | 1448507_at   | 55  | 198  | <b>3.64</b>  |
| Egflam        | Mm.203208              | AV024806  | 1434647_at   | 41  | 120  | <b>2.99</b>  |
| Enc1          | Mm.241073              | BM120053  | 1420965_a_at | 30  | 12   | 0.38         |
| Epha6         | Mm.353171              | NM_007938 | 1421527_at   | 10  | 21   | <b>2.08</b>  |
| Epha7         | Mm.257266              | BC026153  | 1451991_at   | 11  | 3    | 0.19         |
| Eras          | Mm.250895              | AV212609  | 1456511_x_at | 137 | 64   | 0.46         |
| Etl4          | Mm.237935              | BM250266  | 1426880_at   | 179 | 470  | <b>2.61</b>  |
| F13b          | Mm.30105               | NM_031164 | 1419131_at   | 19  | 6    | 0.31         |
| Fcgr1         | Mm.150                 | AF143181  | 1417876_at   | 7   | 245  | <b>35.89</b> |
| Fezf1         | Mm.55115               | AK014242  | 1429991_at   | 12  | 3    | 0.34         |
| Flot1         | Mm.2931                | NM_008027 | 1448559_at   | 393 | 1663 | <b>4.27</b>  |
| Foxp2         | Mm.432481              | AV322952  | 1438231_at   | 98  | 36   | 0.39         |
| Foxp2         | Mm.432481              | AV322952  | 1438232_at   | 55  | 23   | 0.41         |
| Foxp2         | Mm.432481              | BM964154  | 1440108_at   | 58  | 18   | 0.32         |
| Frmpr1        | Mm.24783               | BM213356  | 1435189_at   | 143 | 291  | <b>2.00</b>  |
| Fshr          | Mm.57155               | NM_013523 | 1450810_at   | 23  | 48   | <b>2.05</b>  |
| Fstl5         | Mm.379337              | BB374771  | 1439904_at   | 20  | 8    | 0.41         |
| Ftl2; Ftl1    | Mm.431913;<br>Mm.30357 | NM_008049 | 1422302_s_at | 237 | 462  | <b>2.08</b>  |
| Fxn           | Mm.7319                | AV007132  | 1427282_a_at | 40  | 15   | 0.34         |
| Gca           | Mm.219877              | BC021450  | 1451451_at   | 7   | 13   | <b>2.09</b>  |
| Gcc1          | Mm.332950              | AV339946  | 1429033_at   | 36  | 83   | <b>2.29</b>  |
| Gimap8        | Mm.86514               | BM243674  | 1456061_at   | 41  | 15   | 0.38         |
| Gja7          | Mm.390369              | AV148957  | 1447787_x_at | 7   | 19   | <b>2.29</b>  |
| Gldc          | Mm.274852              | NM_138595 | 1416049_at   | 15  | 200  | <b>13.43</b> |
| Gli3          | Mm.5098                | BB311687  | 1455154_at   | 189 | 417  | <b>2.29</b>  |
| Gli3          | Mm.5098                | AW546010  | 1456067_at   | 140 | 287  | <b>2.09</b>  |
| Gm1060        | Mm.256588              | BG070552  | 1455279_at   | 31  | 69   | <b>2.28</b>  |
| Gm1960        | Mm.244289              | BB829808  | 1438148_at   | 5   | 2    | 0.24         |
| Gm566         | Mm.297245              | BG243248  | 1452614_at   | 44  | 16   | 0.35         |
| Gm691         | Mm.441156              | BQ174072  | 1455714_at   | 90  | 44   | 0.46         |
| Gpr125        | Mm.272974              | BG277370  | 1431034_at   | 33  | 18   | 0.48         |
| Gpr177        | Mm.6766                | BC018381  | 1423824_at   | 16  | 8    | 0.49         |
| Gpr62         | Mm.326268              | BE955672  | 1442138_at   | 4   | 8    | <b>2.02</b>  |
| H2-Aa         | Mm.235338              | BE688749  | 1435290_x_at | 100 | 37   | 0.37         |
| H2-Aa         | Mm.235338              | AV018723  | 1438858_x_at | 29  | 12   | 0.38         |
| Has3          | Mm.56986               | NM_008217 | 1420589_at   | 145 | 20   | 0.15         |
| Hck           | Mm.715                 | NM_010407 | 1449455_at   | 57  | 143  | <b>2.51</b>  |
| Hdgfrp3       | Mm.221412              | BB291880  | 1450924_at   | 9   | 23   | <b>2.45</b>  |
| Hes1          | Mm.390859              | BC018375  | 1418102_at   | 7   | 36   | <b>5.14</b>  |

|                                                                                                     |                                                                                                             |           |              |     |      |              |
|-----------------------------------------------------------------------------------------------------|-------------------------------------------------------------------------------------------------------------|-----------|--------------|-----|------|--------------|
| Hist1h3f;<br>Hist2h3c;<br>Hist1h3b;<br>Hist1h3d;<br>Hist1h3e;<br>Hist1h3h;<br>Hist1h3i;<br>Hist2h3b | Mm.221389;<br>Mm.383293;<br>Mm.342457;<br>Mm.347699;<br>Mm.261658;<br>Mm.377874;<br>Mm.390558;<br>Mm.358797 | AK010121  | 1431231_at   | 87  | 40   | 0.46         |
| Hmgn3                                                                                               | Mm.244426                                                                                                   | AK002970  | 1431777_a_at | 32  | 253  | <b>8.43</b>  |
| Hmgn3                                                                                               | Mm.244426                                                                                                   | AV018952  | 1434875_a_at | 105 | 1044 | <b>10.36</b> |
| Hoxd1                                                                                               | Mm.4932                                                                                                     | NM_010467 | 1420573_at   | 6   | 14   | <b>2.33</b>  |
| Hoxd8                                                                                               | Mm.280673                                                                                                   | AA265122  | 1431099_at   | 26  | 72   | <b>2.83</b>  |
| Hs1bp3                                                                                              | Mm.309954                                                                                                   | AW541327  | 1433843_at   | 38  | 10   | 0.28         |
| Hspa1a                                                                                              | Mm.6388                                                                                                     | AW763765  | 1452388_at   | 188 | 365  | <b>2.09</b>  |
| Htr5b                                                                                               | Mm.4833                                                                                                     | NM_010483 | 1422196_at   | 12  | 29   | <b>2.28</b>  |
| Ick                                                                                                 | Mm.288719                                                                                                   | NM_019987 | 1448310_at   | 219 | 100  | 0.46         |
| Idh1                                                                                                | Mm.9925                                                                                                     | NM_010497 | 1422433_s_at | 469 | 202  | 0.37         |
| Igsf11                                                                                              | Mm.245564                                                                                                   | BM899311  | 1460607_at   | 73  | 18   | 0.24         |
| Igsf21                                                                                              | Mm.298731                                                                                                   | BB769866  | 1433950_at   | 15  | 34   | <b>2.25</b>  |
| Il28ra                                                                                              | Mm.259623                                                                                                   | AW212870  | 1460598_at   | 33  | 74   | <b>2.39</b>  |
| Inpp5e                                                                                              | Mm.330070                                                                                                   | BM217803  | 1423229_at   | 74  | 35   | 0.48         |
| Inpp5e                                                                                              | Mm.330070                                                                                                   | BM217803  | 1423230_at   | 19  | 9    | 0.46         |
| Irx1                                                                                                | Mm.316056                                                                                                   | AF165984  | 1451983_at   | 15  | 37   | <b>2.59</b>  |
| Irx                                                                                                 | Mm.158735                                                                                                   | AK018615  | 1431922_at   | 14  | 32   | <b>2.18</b>  |
| Itgae                                                                                               | Mm.96                                                                                                       | AV210813  | 1447541_s_at | 49  | 210  | <b>4.45</b>  |
| Itgae                                                                                               | Mm.96                                                                                                       | NM_008399 | 1449216_at   | 22  | 53   | <b>2.32</b>  |
| Kalrn                                                                                               |                                                                                                             | BB662566  | 1448023_at   | 380 | 102  | 0.25         |
| Kalrn                                                                                               |                                                                                                             | BB560050  | 1457690_at   | 88  | 31   | 0.35         |
| Kcna5                                                                                               | Mm.222831                                                                                                   | NM_008419 | 1417680_at   | 7   | 15   | <b>2.17</b>  |
| Krt25                                                                                               | Mm.268173                                                                                                   | NM_133730 | 1418173_at   | 95  | 40   | 0.46         |
| Krt35                                                                                               | Mm.37952                                                                                                    | NM_016880 | 1420409_at   | 12  | 28   | <b>2.42</b>  |
| Krt72                                                                                               | Mm.298210                                                                                                   | AA791107  | 1419840_at   | 101 | 47   | 0.48         |
| Krtcap2                                                                                             | Mm.177991                                                                                                   | NM_025327 | 1417058_a_at | 221 | 105  | 0.47         |
| Krtcap2                                                                                             | Mm.177991                                                                                                   | NM_025327 | 1417059_at   | 270 | 128  | 0.47         |
| L3mbtl3                                                                                             | Mm.338439                                                                                                   | BB022070  | 1434246_at   | 63  | 23   | 0.37         |
| L3mbtl3                                                                                             | Mm.338439                                                                                                   | BB022070  | 1454882_at   | 148 | 38   | 0.24         |
| Lect2                                                                                               | Mm.16973                                                                                                    | NM_010702 | 1449492_a_at | 43  | 6    | 0.12         |
| Lonrf2                                                                                              | Mm.296437                                                                                                   | AK013739  | 1429965_at   | 53  | 110  | <b>2.06</b>  |
| Lrrtm3                                                                                              | Mm.244348                                                                                                   | BB132359  | 1440112_at   | 105 | 39   | 0.36         |
| Mak                                                                                                 | Mm.8149                                                                                                     | BG069426  | 1422725_at   | 10  | 22   | <b>2.17</b>  |
| Map2k6                                                                                              | Mm.14487                                                                                                    | BB261602  | 1426850_a_at | 94  | 43   | 0.48         |
| Mapt                                                                                                | Mm.1287                                                                                                     | M18775    | 1424719_a_at | 6   | 27   | <b>4.21</b>  |
| Mar4                                                                                                | Mm.337023                                                                                                   | BB260801  | 1441223_at   | 33  | 11   | 0.35         |
| Mfhas1                                                                                              | Mm.103246                                                                                                   | BB107412  | 1429005_at   | 141 | 46   | 0.33         |
| Mfhas1                                                                                              | Mm.103246                                                                                                   | BE225764  | 1436897_at   | 38  | 19   | 0.47         |
| MGI:2660854                                                                                         | Mm.66952                                                                                                    | AV271256  | 1439613_at   | 24  | 13   | 0.48         |
| Minpp1                                                                                              | Mm.255116                                                                                                   | AK017558  | 1429750_at   | 10  | 4    | 0.32         |
| Morc1                                                                                               | Mm.250060                                                                                                   | NM_010816 | 1419418_a_at | 242 | 119  | 0.48         |
| Mrpl23                                                                                              | Mm.12144                                                                                                    | NM_011288 | 1416948_at   | 295 | 93   | 0.30         |
| Mrps16                                                                                              | Mm.23747                                                                                                    | NM_025440 | 1448869_a_at | 555 | 1212 | <b>2.20</b>  |
| Mrps2                                                                                               | Mm.294951                                                                                                   | AV031454  | 1420845_at   | 31  | 13   | 0.41         |
| Mrps2                                                                                               | Mm.294951                                                                                                   | AV031454  | 1420846_at   | 527 | 205  | 0.38         |
| Mtmr6                                                                                               | Mm.247007                                                                                                   | BC020019  | 1425485_at   | 31  | 11   | 0.36         |
| Mtmr6                                                                                               | Mm.247007                                                                                                   | BC020019  | 1425486_s_at | 146 | 53   | 0.35         |
| Mtmr6                                                                                               | Mm.247007                                                                                                   | BB297632  | 1456540_s_at | 92  | 32   | 0.33         |
| Muc15                                                                                               | Mm.32566                                                                                                    | BC020027  | 1426941_at   | 20  | 6    | 0.36         |
| Mup2; Mup1                                                                                          | Mm.237772;<br>Mm.335875                                                                                     | NM_031188 | 1420465_s_at | 24  | 10   | 0.47         |
| Myh11                                                                                               | Mm.250705                                                                                                   | BC026142  | 1448962_at   | 354 | 179  | 0.50         |
| Myl2                                                                                                | Mm.1529                                                                                                     | NM_010861 | 1448394_at   | 21  | 44   | <b>2.19</b>  |

|                                              |                         |           |              |      |     |             |
|----------------------------------------------|-------------------------|-----------|--------------|------|-----|-------------|
| Mylip                                        | Mm.212855               | BC010206  | 1424988_at   | 152  | 46  | 0.30        |
| Ndufb7                                       | Mm.29683                | NM_025843 | 1416417_a_at | 2243 | 926 | 0.41        |
| Ndufb7                                       | Mm.29683                | NM_025843 | 1448331_at   | 456  | 212 | 0.48        |
| Neu1                                         | Mm.8856                 | AI649303  | 1416831_at   | 21   | 9   | 0.38        |
| Npal3                                        | Mm.26548                | AK018640  | 1429241_at   | 53   | 25  | 0.44        |
| Nr2c1                                        | Mm.107483               | NM_011629 | 1418605_at   | 200  | 49  | 0.24        |
| Nr4a2                                        | Mm.3507                 | BB703394  | 1455034_at   | 15   | 31  | <b>2.00</b> |
| Nrp2                                         | Mm.266341               | BB752129  | 1435349_at   | 6    | 24  | <b>4.10</b> |
| Nsbp1                                        | Mm.298443               | NM_016710 | 1418152_at   | 210  | 104 | 0.48        |
| Nsmce4a                                      | Mm.21714                | AK010349  | 1428213_at   | 1175 | 399 | 0.34        |
| Nsmce4a                                      | Mm.21714                | AV151371  | 1439461_x_at | 72   | 36  | 0.49        |
| Ntn1                                         | Mm.39095                | BI143915  | 1454974_at   | 43   | 20  | 0.45        |
| Obfc2b                                       | Mm.46614                | BC026942  | 1451291_at   | 232  | 483 | <b>2.09</b> |
| Ocrl                                         | Mm.210343               | BB751120  | 1438396_at   | 86   | 41  | 0.45        |
| Olfm4                                        | Mm.26456                | AV290148  | 1437060_at   | 16   | 6   | 0.36        |
| Osbp17                                       | Mm.379194               | BB768954  | 1428893_at   | 115  | 62  | 0.50        |
| Oxr1                                         | Mm.254267               | AW548944  | 1418501_a_at | 24   | 86  | <b>3.51</b> |
| Pcdh19                                       | Mm.39738                | BB053591  | 1437360_at   | 15   | 36  | <b>2.40</b> |
| Pcdh19                                       | Mm.39738                | BB732600  | 1444422_at   | 9    | 23  | <b>2.31</b> |
| Pcdh15                                       | Mm.283857               | BB174795  | 1443421_s_at | 19   | 4   | 0.17        |
| Pcdh17                                       | Mm.87553                | NM_053142 | 1448933_at   | 15   | 5   | 0.34        |
| Pdha2                                        | Mm.4223                 | AV206348  | 1450962_at   | 15   | 41  | <b>2.75</b> |
| Pdzrn3                                       | Mm.321654               | NM_018884 | 1416846_a_at | 334  | 779 | <b>2.27</b> |
| Phlpp                                        | Mm.24115                | BC024670  | 1426994_at   | 57   | 22  | 0.37        |
| Phyh                                         | Mm.391704               | NM_010726 | 1460194_at   | 84   | 213 | <b>2.57</b> |
| Pigc                                         | Mm.45106                | AK014096  | 1424189_at   | 729  | 169 | 0.23        |
| Pim1                                         | Mm.328931               | AI323550  | 1435458_at   | 260  | 126 | 0.48        |
| Pink1                                        | Mm.18539                | AV371921  | 1441937_s_at | 39   | 19  | 0.46        |
| Plcb4                                        | Mm.38009                | BM730668  | 1435771_at   | 69   | 32  | 0.45        |
| Plek                                         | Mm.98232                | AF181829  | 1417523_at   | 22   | 7   | 0.36        |
| Plek                                         | Mm.98232                | AF181829  | 1448748_at   | 135  | 52  | 0.39        |
| Plek                                         | Mm.98232                | AF181829  | 1448749_at   | 21   | 7   | 0.37        |
| Plxna2                                       | Mm.2251                 | BB085537  | 1429772_at   | 148  | 24  | 0.15        |
| Plxna2                                       | Mm.2251                 | D86949    | 1451753_at   | 186  | 54  | 0.29        |
| Plxna2                                       | Mm.2251                 | BB085537  | 1453286_at   | 238  | 59  | 0.25        |
| Plxna2                                       | Mm.2251                 | BB002869  | 1455037_at   | 152  | 45  | 0.29        |
| Plxnb3                                       |                         | AI451018  | 1440813_s_at | 27   | 12  | 0.43        |
| Ppa2                                         | Mm.210305               | BC011417  | 1424488_a_at | 262  | 92  | 0.34        |
| Ppm1e                                        | Mm.341988               | BB346082  | 1434990_at   | 24   | 3   | 0.10        |
| Prkg2                                        | Mm.263002               | BB823350  | 1435162_at   | 55   | 24  | 0.42        |
| Prmt6                                        | Mm.36115                | BB233495  | 1457071_x_at | 7    | 4   | 0.36        |
| Ptgs2                                        | Mm.292547               | M94967    | 1417262_at   | 4    | 15  | <b>3.30</b> |
| Ptprk                                        | Mm.332303               | AI893646  | 1423278_at   | 23   | 11  | 0.42        |
| Pxdn                                         | Mm.251774               | AK010185  | 1428259_at   | 17   | 8   | 0.40        |
| Pygl                                         | Mm.256926               | NM_133198 | 1417741_at   | 77   | 326 | <b>4.31</b> |
| Rab24                                        | Mm.220923               | NM_009000 | 1421872_at   | 20   | 41  | <b>2.05</b> |
| Rab32                                        | Mm.31486                | NM_026405 | 1416527_at   | 378  | 159 | 0.41        |
| Raet1a; Raet1b;<br>Raet1c; Raet1d;<br>Raet1e | Mm.439724;<br>Mm.440891 | NM_009016 | 1420603_s_at | 160  | 72  | 0.46        |
| Rag1ap1                                      | Mm.17958                | NM_009057 | 1448948_at   | 25   | 10  | 0.40        |
| Rarb                                         | Mm.259318               | BB266455  | 1454906_at   | 18   | 7   | 0.37        |
| Rbm35b                                       | Mm.183003               | BF124648  | 1433683_at   | 15   | 33  | <b>2.06</b> |
| Reg3d                                        | Mm.33691                | AB028625  | 1424009_at   | 21   | 10  | 0.48        |
| Rhou                                         | Mm.168257               | AF378088  | 1449027_at   | 16   | 3   | 0.17        |
| Rhou                                         | Mm.168257               | AF378088  | 1449028_at   | 27   | 6   | 0.26        |
| Rnd1                                         | Mm.274010               | BE852181  | 1455197_at   | 19   | 36  | <b>2.01</b> |
| Rnf135                                       | Mm.22985                | AK010429  | 1452289_a_at | 76   | 160 | <b>2.07</b> |
| Rnf43                                        | Mm.440230               | BC004781  | 1427008_at   | 62   | 32  | 0.49        |
| Rnpepl1                                      | Mm.200971               | BB540667  | 1454753_at   | 96   | 32  | 0.32        |

|          |           |           |              |      |     |       |
|----------|-----------|-----------|--------------|------|-----|-------|
| Rpl5     | Mm.399372 | BM114165  | 1451077_at   | 18   | 8   | 0.45  |
| Rps6kc1  | Mm.220912 | BM207149  | 1434563_at   | 26   | 10  | 0.38  |
| Sat1     | Mm.2734   | NM_009121 | 1420502_at   | 64   | 11  | 0.17  |
| Scarb2   | Mm.297964 | NM_007644 | 1460235_at   | 32   | 7   | 0.23  |
| Sema3e   | Mm.134093 | NM_011348 | 1419717_at   | 24   | 10  | 0.45  |
| Sfrs3    | Mm.6787   | NM_013663 | 1416151_at   | 17   | 10  | 0.48  |
| Sh3bgrl  | Mm.260760 | BB248904  | 1436997_x_at | 130  | 61  | 0.50  |
| Sh3kbp1  | Mm.286495 | AK018032  | 1432269_a_at | 96   | 41  | 0.44  |
| Shcbp1   | Mm.37801  | NM_011369 | 1416299_at   | 1140 | 471 | 0.42  |
| Slc16a12 | Mm.74636  | AV220703  | 1434188_at   | 34   | 17  | 0.45  |
| Slc16a6  | Mm.265874 | NM_134038 | 1417884_at   | 20   | 91  | 4.67  |
| Slc16a9  | Mm.19325  | AK004684  | 1429726_at   | 23   | 8   | 0.33  |
| Slc35b2  | Mm.289716 | BC025875  | 1423927_at   | 116  | 29  | 0.24  |
| Slc35b2  | Mm.289716 | AK003377  | 1429007_at   | 31   | 9   | 0.28  |
| Slc4a10  | Mm.314497 | NM_033552 | 1417672_at   | 88   | 28  | 0.32  |
| Slc4a3   | Mm.5053   | NM_009208 | 1418485_at   | 23   | 46  | 2.10  |
| Slc6a13  | Mm.258596 | BC023117  | 1424338_at   | 10   | 27  | 2.98  |
| Slco4c1  | Mm.11662  | AV024403  | 1437870_at   | 39   | 16  | 0.41  |
| Slit2    | Mm.289739 | BG963150  | 1424659_at   | 10   | 29  | 2.87  |
| Snx19    | Mm.35084  | BB283306  | 1436147_at   | 18   | 8   | 0.43  |
| Socs1    | Mm.130    | AB000710  | 1450446_a_at | 54   | 26  | 0.47  |
| Sox2     | Mm.65396  | U31967    | 1416967_at   | 29   | 63  | 2.22  |
| Sp5      | Mm.423397 | NM_022435 | 1422914_at   | 5    | 43  | 8.12  |
| Spata13  | Mm.149776 | AV271736  | 1454656_at   | 69   | 32  | 0.43  |
| Spry2    | Mm.390759 | BB529691  | 1436584_at   | 5    | 11  | 2.15  |
| Stk10    | Mm.8235   | NM_009288 | 1417751_at   | 366  | 160 | 0.46  |
| Stoml1   | Mm.216502 | AK007508  | 1452738_at   | 29   | 9   | 0.30  |
| Suhw4    | Mm.242791 | BB430212  | 1457455_at   | 15   | 7   | 0.46  |
| Sult1d1  | Mm.6824   | NM_016771 | 1448973_at   | 18   | 9   | 0.42  |
| Sult2b1  | Mm.271634 | NM_017465 | 1417335_at   | 45   | 13  | 0.33  |
| Synpo2l  | Mm.35789  | AK004253  | 1428295_at   | 1    | 5   | 3.84  |
| Synpo2l  | Mm.35789  | BB322227  | 1447657_s_at | 31   | 69  | 2.26  |
| Syt12    | Mm.262270 | NM_134164 | 1422878_at   | 29   | 6   | 0.21  |
| Syt7     | Mm.182654 | AV138438  | 1441927_at   | 165  | 39  | 0.21  |
| Syt7     | Mm.182654 | A1854420  | 1460081_at   | 378  | 95  | 0.25  |
| Tal1     | Mm.439685 | NM_011527 | 1449389_at   | 43   | 16  | 0.33  |
| Tarsl2   | Mm.35127  | BQ176328  | 1434738_at   | 35   | 16  | 0.49  |
| Tcfap2a  | Mm.85544  | BC021623  | 1426048_s_at | 35   | 71  | 2.15  |
| Tex15    | Mm.280624 | NM_031374 | 1420719_at   | 764  | 246 | 0.34  |
| Tex261   | Mm.391476 | BF181445  | 1450965_at   | 222  | 78  | 0.34  |
| Tex261   | Mm.391476 | AK013971  | 1452768_at   | 24   | 11  | 0.45  |
| Thsd7b   | Mm.380518 | AV270900  | 1460627_at   | 15   | 7   | 0.43  |
| Timp2    | Mm.206505 | M93954    | 1460287_at   | 20   | 11  | 0.45  |
| Tirap    | Mm.23987  | NM_054096 | 1418685_at   | 71   | 35  | 0.47  |
| Tirap    | Mm.23987  | BB365296  | 1457676_at   | 229  | 94  | 0.40  |
| Tlr1     | Mm.273024 | AF316985  | 1449049_at   | 3    | 156 | 58.02 |
| Tlr3     | Mm.33874  | NM_126166 | 1422782_s_at | 75   | 151 | 2.06  |
| Tmeff2   | Mm.245154 | NM_019790 | 1419073_at   | 24   | 57  | 2.44  |
| Tmem14a  | Mm.441478 | AK017734  | 1428447_at   | 137  | 46  | 0.34  |
| Tmem27   | Mm.143766 | A1314694  | 1435064_a_at | 68   | 30  | 0.41  |
| Tmem56   | Mm.26088  | BB667728  | 1434553_at   | 14   | 58  | 4.08  |
| Tox      | Mm.87051  | BB547854  | 1425483_at   | 17   | 8   | 0.48  |
| Tox      | Mm.87051  | BB547854  | 1425484_at   | 24   | 10  | 0.44  |
| Tox      | Mm.87051  | BF020502  | 1442039_at   | 62   | 29  | 0.44  |
| Tpm1     | Mm.121878 | AK002271  | 1423049_a_at | 69   | 4   | 0.06  |
| Tpm1     | Mm.121878 | M22479    | 1423721_at   | 61   | 14  | 0.24  |
| Trim35   | Mm.43871  | BQ175280  | 1454650_at   | 494  | 212 | 0.44  |
| Trpm6    | Mm.215171 | BM213868  | 1438877_at   | 243  | 124 | 0.49  |
| Tslp     | Mm.143716 | NM_021367 | 1450004_at   | 14   | 4   | 0.37  |
| Tspan1   | Mm.45994  | AV371704  | 1417957_a_at | 112  | 51  | 0.49  |

|         |           |           |              |     |     |             |
|---------|-----------|-----------|--------------|-----|-----|-------------|
| TtlI9   | Mm.44746  | AK015740  | 1430865_s_at | 12  | 5   | 0.35        |
| Ttyh1   | Mm.29729  | NM_021324 | 1422694_at   | 19  | 52  | <b>2.81</b> |
| Ttyh1   | Mm.29729  | BB560071  | 1426617_a_at | 20  | 52  | <b>2.57</b> |
| Ube2e3  | Mm.1485   | AW120830  | 1448671_at   | 7   | 23  | <b>3.23</b> |
| Vangl2  | Mm.36148  | BB417279  | 1436118_at   | 12  | 5   | 0.50        |
| Vps36   | Mm.41453  | AK013045  | 1452898_at   | 76  | 33  | 0.40        |
| Vsn1    | Mm.27005  | NM_012038 | 1420955_at   | 16  | 7   | 0.47        |
| Wfdc15b | Mm.330764 | NM_138685 | 1419195_at   | 29  | 15  | 0.49        |
| Wipi1   | Mm.35817  | BC025560  | 1424917_a_at | 28  | 10  | 0.37        |
| Wipi1   | Mm.35817  | BB044002  | 1438709_at   | 26  | 14  | 0.47        |
| Wipi1   | Mm.35817  | BI251603  | 1439060_s_at | 136 | 52  | 0.38        |
| Wipi1   | Mm.35817  | BG068076  | 1452392_a_at | 55  | 18  | 0.33        |
| Wipi1   | Mm.35817  | BI251603  | 1456624_at   | 22  | 9   | 0.40        |
| Wnt7a   | Mm.56964  | AK004683  | 1423367_at   | 4   | 38  | <b>7.67</b> |
| Wrnip1  | Mm.286680 | NM_030215 | 1448376_at   | 397 | 806 | <b>2.02</b> |
| Xylb    | Mm.219497 | BB431728  | 1426706_s_at | 81  | 18  | 0.23        |
| Zbtb39  | Mm.27258  | AW489513  | 1443880_at   | 108 | 8   | 0.07        |
| Zfp114  | Mm.435485 | BB794862  | 1457185_at   | 14  | 31  | <b>2.08</b> |
| Zfp131  | Mm.139115 | BB833349  | 1459659_at   | 58  | 23  | 0.39        |
| Zfp187  |           | BB354728  | 1457285_at   | 24  | 74  | <b>2.83</b> |
| Zfp282  | Mm.440186 | BB030565  | 1424297_at   | 64  | 21  | 0.33        |
| Zfp282  | Mm.440186 | BB030565  | 1424298_at   | 22  | 6   | 0.25        |
| Zfp398  | Mm.169059 | BB199476  | 1456639_at   | 27  | 13  | 0.44        |
| Zfp41   | Mm.87210  | BB022304  | 1454927_at   | 136 | 288 | <b>2.10</b> |
| Zfp42   | Mm.285848 | NM_009556 | 1418362_at   | 13  | 28  | <b>2.07</b> |
| Zfp503  | Mm.292401 | BB447914  | 1423835_at   | 9   | 31  | <b>3.05</b> |
| Zfp503  | Mm.292401 | BB447914  | 1423836_at   | 5   | 21  | <b>3.42</b> |
| Zfp583  | Mm.333558 | AV174083  | 1439861_at   | 77  | 27  | 0.36        |
| Zhx1    | Mm.244931 | NM_009572 | 1448875_at   | 87  | 27  | 0.31        |
| Zik1    | Mm.49441  | BE824681  | 1433946_at   | 11  | 6   | 0.49        |
|         |           | BF227338  | 1431577_at   | 6   | 3   | 0.41        |
|         |           | AI195532  | 1435245_at   | 8   | 21  | <b>2.85</b> |
|         | Mm.387143 | BE631223  | 1435872_at   | 141 | 64  | 0.47        |
|         | Mm.380256 | AV365582  | 1437967_at   | 21  | 10  | 0.46        |
|         |           | BB138331  | 1439836_at   | 179 | 80  | 0.46        |
|         | Mm.151876 | BB364961  | 1439887_at   | 59  | 28  | 0.47        |
|         | Mm.285452 | AV380966  | 1440084_at   | 40  | 16  | 0.46        |
|         |           | BB667349  | 1441428_at   | 166 | 71  | 0.41        |
|         | Mm.384060 | AI642706  | 1441818_at   | 25  | 8   | 0.34        |
|         | Mm.362032 | AV111366  | 1443735_at   | 14  | 6   | 0.38        |
|         | Mm.376549 | BB255018  | 1445275_at   | 16  | 8   | 0.47        |
|         |           | BB704012  | 1447173_at   | 15  | 6   | 0.39        |
|         | Mm.184776 | BB545511  | 1447550_at   | 27  | 93  | <b>3.32</b> |
|         | Mm.370046 | BB425316  | 1455722_at   | 90  | 41  | 0.44        |
|         | Mm.261326 | BB457336  | 1457701_at   | 20  | 5   | 0.27        |
|         | Mm.361260 | BG067824  | 1457850_at   | 335 | 152 | 0.46        |
|         |           | BB520860  | 1458145_at   | 76  | 37  | 0.46        |
|         |           | BB245422  | 1458212_at   | 15  | 7   | 0.46        |
|         |           | AW492552  | 1458463_at   | 12  | 6   | 0.49        |

\*\_a suffix, fully complementary to multiple alternative transcripts from the same gene; \_s suffix, fully complementary to multiple transcripts from different genes; \_x suffix, fully complementary to a unique transcript, but partial cross-hybridization with other sequences is expected; all other probesets are fully complementary to unique transcripts.

Some genes are represented by more than one probeset.

Bold indicates Tg/Ntg ratios that are greater than 1.
