# Supplementary material for: Maternal depletion of CTCF reveals multiple functions during oocyte and preimplantation embryo development
Source: Oxford University Press journal article supplement (doi:10.1242/dev.024539), 2008-07-10
Supplement: dev024539tables2.pdf [file dev024539tables2.pdf]

**Table S2. EASE analysis of 1.4-fold downregulated transcripts**

| Biological process*                              | List hits | EASE score |
|--------------------------------------------------|-----------|------------|
| Sulfur metabolism                                | 8         | 3.17E-03   |
| Glutathione metabolism                           | 4         | 1.79E-02   |
| Sulfate assimilation                             | 3         | 1.93E-02   |
| Sulfur utilization                               | 3         | 1.93E-02   |
| Cell surface receptor linked signal transduction | 34        | 3.15E-02   |
| Cell adhesion                                    | 17        | 3.19E-02   |

\*All over-represented categories are shown.
