# Supplementary material for: Maternal depletion of CTCF reveals multiple functions during oocyte and preimplantation embryo development
Source: Oxford University Press journal article supplement (doi:10.1242/dev.024539), 2008-07-10
Supplement: dev024539tables3.pdf [file dev024539tables3.pdf]

**Table S3. EASE analysis of 1.4-fold upregulated transcripts**

| Biological process*                              | List hits | EASE score |
|--------------------------------------------------|-----------|------------|
| Morphogenesis                                    | 38        | 9.82E-06   |
| Development                                      | 51        | 2.15E-05   |
| Organogenesis                                    | 30        | 1.89E-04   |
| Inflammatory response                            | 8         | 2.65E-04   |
| Innate immune response                           | 8         | 3.17E-04   |
| Response to abiotic stimulus                     | 12        | 1.57E-03   |
| Response to chemical substance                   | 8         | 2.06E-03   |
| Behavior                                         | 8         | 2.31E-03   |
| Response to external stimulus                    | 18        | 2.41E-03   |
| Pattern specification                            | 8         | 2.59E-03   |
| Learning                                         | 4         | 4.76E-03   |
| Response to biotic stimulus                      | 18        | 4.78E-03   |
| Organismal physiological process                 | 22        | 5.75E-03   |
| Cell surface receptor linked signal transduction | 26        | 5.76E-03   |
| Response to wounding                             | 8         | 6.41E-03   |
| Regulation of biological process                 | 62        | 6.66E-03   |
| Immune response                                  | 13        | 6.83E-03   |
| Embryonic morphogenesis                          | 5         | 8.87E-03   |
| Skeletal development                             | 6         | 1.04E-02   |
| Response to pest, pathogen, or parasite          | 9         | 1.12E-02   |
| Response to external biotic stimulus             | 9         | 1.28E-02   |
| Regulation of transcription                      | 44        | 1.79E-02   |
| Cell communication                               | 52        | 1.82E-02   |
| Regulation of nucleic acid metabolism            | 44        | 1.93E-02   |
| Learning or memory                               | 4         | 2.24E-02   |
| Defense response                                 | 13        | 2.49E-02   |
| Chemotaxis                                       | 5         | 2.51E-02   |
| Taxis                                            | 5         | 2.51E-02   |
| Signal transduction                              | 44        | 2.65E-02   |
| Regulation of physiological process              | 46        | 2.79E-02   |
| G-protein coupled receptor signaling pathway     | 13        | 2.90E-02   |
| Regulation of transcription, DNA-dependent       | 42        | 2.98E-02   |
| Cell maturation                                  | 3         | 4.03E-02   |
| Transcription                                    | 44        | 4.26E-02   |
| Transcription, DNA-dependent                     | 42        | 4.49E-02   |
| Regulation of metabolism                         | 44        | 4.88E-02   |

\*All over-represented categories are shown.
