# Supplementary material for: Maternal depletion of CTCF reveals multiple functions during oocyte and preimplantation embryo development
Source: Oxford University Press journal article supplement (doi:10.1242/dev.024539), 2008-07-10
Supplement: dev024539tables4.pdf [file dev024539tables4.pdf]

**Table S4. Downregulated sulfur metabolism genes**

| Gene symbol | Gene name                                        |
|-------------|--------------------------------------------------|
| Chst11      | Chondroitin 4-sulfotransferase                   |
| Gss         | Glutathione synthetase                           |
| Gstk1       | RIKEN cDNA 0610025I19 gene                       |
| Idh1        | Isocitrate dehydrogenase 1 (NADP+), soluble      |
| Mgst1       | Microsomal glutathione S-transferase 1           |
| Papss2      | 3'-Phosphoadenosine 5'-phosphosulfate synthase 2 |
| Sult1d1     | N-sulfotransferase                               |
| Sult2b1     | Sulfotransferase family, cytosolic, 2B, member 1 |
