# Supplementary material for: Maternal depletion of CTCF reveals multiple functions during oocyte and preimplantation embryo development
Source: Oxford University Press journal article supplement (doi:10.1242/dev.024539), 2008-07-10
Supplement: dev024539tables5.pdf [file dev024539tables5.pdf]

**Table S5. Downregulated cell surface receptor linked signal transduction genes**

| Gene symbol   | Gene name                                                            |
|---------------|----------------------------------------------------------------------|
| 2610028F08Rik | RIKEN cDNA 2610028F08 gene                                           |
| 6330442E02Rik | Hypothetical protein 6330442E02                                      |
| Adora2b       | Adenosine A2b receptor                                               |
| Alk           | Anaplastic lymphoma kinase                                           |
| Atrn1         | Hypothetical protein LOC226255                                       |
| AW551984      | Expressed sequence AW551984                                          |
| Bai1          | Brain-specific angiogenesis inhibitor 1                              |
| Csnk2a2       | Casein kinase II, alpha 2, polypeptide                               |
| Edg2          | Endothelial differentiation, lysophosphatidic acid G-protein-coupled |
| Ednrb         | Endothelin receptor type B                                           |
| Epha3         | Eph receptor A3                                                      |
| Epha7         | Eph receptor A7                                                      |
| Gnai1         | Guanine nucleotide binding protein, alpha inhibiting 1               |
| Gnaq          | Guanine nucleotide binding protein, alpha q polypeptide              |
| Gpr125        | RIKEN cDNA 3830613O22 gene                                           |
| Gpr63         | G protein-coupled receptor 63                                        |
| Gpr84         | G protein-coupled receptor 84                                        |
| Gprk5         | G protein-coupled receptor kinase 5                                  |
| Homer1        | Homer homolog 1 (Drosophila)                                         |
| Hs1bp3        | HS1 binding protein 3                                                |
| Itgav         | Integrin alpha V                                                     |
| Itgb2l        | Integrin beta 2-like                                                 |
| Osmr          | Oncostatin receptor                                                  |
| P2y5          | Purinergic receptor (family A group 5)                               |
| Pcsk5         | Proprotein convertase subtilisin/kexin type 5                        |
| Phip          | Pleckstrin homology domain interacting protein                       |
| Ptprk         | Protein tyrosine phosphatase, receptor type, K                       |
| Ptprs         | Protein tyrosine phosphatase, receptor type, S                       |
| Pxn           | Paxillin                                                             |
| Socs1         | Suppressor of cytokine signaling 1                                   |
| Stxbp4        | Syntaxin binding protein 4                                           |
| Tac2          | Tachykinin 2                                                         |
| Tcf7l2        | Transcription factor 7-like 2, T-cell specific, HMG-box              |
| Tirap         | Toll-interleukin 1 receptor (TIR) domain-containing adaptor protein  |
