# Supplementary material for: Maternal depletion of CTCF reveals multiple functions during oocyte and preimplantation embryo development
Source: Oxford University Press journal article supplement (doi:10.1242/dev.024539), 2008-07-10
Supplement: dev024539tables6.pdf [file dev024539tables6.pdf]

**Table S6. Downregulated cell-adhesion genes**

| Gene symbol   | Gene name                                             |
|---------------|-------------------------------------------------------|
| Bysl          | Bystin-like                                           |
| C130076O07Rik | RIKEN cDNA C130076O07 gene                            |
| Cml2          | Camello-like 2                                        |
| Cntnap4       | Contactin associated protein 4                        |
| Col13a1       | Procollagen, type XIII, alpha 1                       |
| Col19a1       | Procollagen, type XIX, alpha 1                        |
| Icam1         | Intercellular adhesion molecule                       |
| Itgav         | Integrin alpha V                                      |
| Itgb2l        | Integrin beta 2-like                                  |
| Kitl          | Kit ligand                                            |
| Pard3         | Par-3 (partitioning defective 3) homolog (C. elegans) |
| Pcdhb15       | Protocadherin beta 15                                 |
| Pcdhb17       | Protocadherin beta 17                                 |
| Prlr          | Prolactin receptor                                    |
| Ptprs         | Protein tyrosine phosphatase, receptor type, 5        |
| Pxn           | Paxillin                                              |
| Scarb2        | Scavenger receptor class B, member 2                  |
