# Supplementary material for: Maternal depletion of CTCF reveals multiple functions during oocyte and preimplantation embryo development
Source: Oxford University Press journal article supplement (doi:10.1242/dev.024539), 2008-07-10
Supplement: dev024539tables7.pdf [file dev024539tables7.pdf]

**Table S7. Upregulated morphogenesis genes**

| Gene symbol | Gene name                                                              |
|-------------|------------------------------------------------------------------------|
| Ank         | Progressive ankylosis                                                  |
| Anxa2       | Annexin A2                                                             |
| Arhgap15    | Rho GTPase activating protein 15                                       |
| Bmp7        | Bone morphogenetic protein 7                                           |
| Cobl        | Cordon-bleu                                                            |
| Crb3        | Hypothetical protein 5730439B18                                        |
| Cxcl13      | Chemokine (C-X-C motif) ligand 13                                      |
| Cxcr4       | Chemokine (C-X-C motif) receptor 4                                     |
| Dpysl5      | Dihydropyrimidinase-like 5                                             |
| Egr2        | Early growth response 2                                                |
| Emx2        | Empty spiracles homolog 2 (Drosophila)                                 |
| Epb4.2      | Erythrocyte protein band 4.2                                           |
| Fgfr2       | Fibroblast growth factor receptor 2                                    |
| Gata4       | GATA binding protein 4                                                 |
| Gli3        | GLI-Kruppel family member GLI3                                         |
| Hoxa1       | Homeo box A1                                                           |
| Hoxd1       | Homeo box D1                                                           |
| Hoxd13      | Homeo box D13                                                          |
| Hoxd8       | Homeo box D8                                                           |
| Ilk         | Integrin linked kinase                                                 |
| Mbp         | Myelin basic protein                                                   |
| Myl2        | Myosin, light polypeptide 2, regulatory, cardiac, slow                 |
| Nedd9       | Neural precursor cell expressed, developmentally down-regulated gene 9 |
| Nos3        | Nitric oxide synthase 3, endothelial cell                              |
| Nrp2        | Neuropilin 2                                                           |
| Ostm1       | Grey lethal osteopetrosis                                              |
| Phlda2      | Tumor-suppressing subchromosomal transferable fragment 3               |
| Prelp       | Proline arginine-rich end leucine-rich repeat                          |
| Prkar2b     | Protein kinase, cAMP dependent regulatory, type II beta                |
| Prkar2b     | Protein kinase, cAMP dependent regulatory, type II beta                |
| Rnd1        | RIKEN cDNA A830014L09 gene                                             |
| Ror2        | Receptor tyrosine kinase-like orphan receptor 2                        |
| Runx2       | Runt related transcription factor 2                                    |
| Scrib       | Scribble homolog 1 (Drosophila)                                        |
| Slit2       | Slit homolog 2 (Drosophila)                                            |
| Socs3       | Suppressor of cytokine signaling 3                                     |
| Spry2       | Sprouty homolog 2 (Drosophila)                                         |
| Tpm3        | Tropomyosin 3, gamma                                                   |
| Wnt7a       | Wingless-related MMTV integration site 7A                              |
