# Supplementary material for: Maternal depletion of CTCF reveals multiple functions during oocyte and preimplantation embryo development
Source: Oxford University Press journal article supplement (doi:10.1242/dev.024539), 2008-07-10
Supplement: dev024539tables9.pdf [file dev024539tables9.pdf]

**Table S9. Upregulated transcription genes**

| Gene symbol | Gene name                                           |
|-------------|-----------------------------------------------------|
| Atbf1       | AT motif binding factor 1                           |
| Bach2       | BTB and CNC homology 2                              |
| Basp1       | Brain abundant, membrane attached signal protein 1  |
| Bcor        | Bcl6 interacting corepressor                        |
| Carm1       | Coactivator-associated arginine methyltransferase 1 |
| Cebpd       | CCAAT/enhancer binding protein (C/EBP), delta       |
| Egr2        | Early growth response 2                             |
| Emx2        | Empty spiracles homolog 2 (Drosophila)              |
| Evx1        | Even skipped homeotic gene 1 homolog                |
| Gata4       | GATA binding protein 4                              |
| Gli3        | GLI-Kruppel family member GLI3                      |
| Gls2        | Liver mitochondrial glutaminase                     |
| Gsc         | Goosecoid                                           |
| Hes1        | Hairy and enhancer of split 1 (Drosophila)          |
| Hoxa1       | Homeo box A1                                        |
| Hoxd1       | Homeo box D1                                        |
| Hoxd13      | Homeo box D13                                       |
| Hoxd8       | Homeo box D8                                        |
| Irx1        | Iroquois related homeobox 1 (Drosophila)            |
| Junb        | Jun-B oncogene                                      |
| Lbx1h       | Lady bird-like homeobox 1 homolog (Drosophila)      |
| Mbd3        | Methyl-CpG binding domain protein 3                 |
| Mxi1        | Max interacting protein 1                           |
| Nfatc2      | Nuclear factor of activated T-cells, cytoplasmic 2  |
| Nfe2l3      | Nuclear factor, erythroid derived 2, like 3         |
| Nr2e3       | Nuclear receptor subfamily 2, group E, member 3     |
| Rbak        | RB-associated KRAB repressor                        |
| Ripk4       | Ankyrin repeat domain 3                             |
| Runx2       | Runt related transcription factor 2                 |
| Six1        | Sine oculis-related homeobox 1 homolog (Drosophila) |
| Sox13       | SRY-box containing gene 13                          |
| Sox15       | SRY-box containing gene 15                          |
| Sox2        | SRY-box containing gene 2                           |
| Sp5         | Trans-acting transcription factor 5                 |
| Tcf15       | Transcription factor 15                             |
| Tcfap2a     | Transcription factor AP-2, alpha                    |
| Tcfcp2l3    | Grainyhead like 2 (Drosophila)                      |
| Trim30      | Tripartite motif protein 30                         |
| Zfp235      | Zinc finger protein 235                             |
| Zfp278      | Zinc finger protein 278                             |
| Zfp41       | Zinc finger protein 41                              |
| Zfp42       | Zinc finger protein 42                              |
| Zfp62       | Zinc finger protein 62                              |
| Znrd1       | RIKEN cDNA 1110014N07 gene                          |
