# Supplementary material for: Maternal depletion of CTCF reveals multiple functions during oocyte and preimplantation embryo development
Source: Oxford University Press journal article supplement (doi:10.1242/dev.024539), 2008-07-10
Supplement: dev024539tables10.pdf [file dev024539tables10.pdf]

**Table S10. Upregulated signal transduction genes**

| Gene symbol | Gene name                                                  |
|-------------|------------------------------------------------------------|
| AW742319    | Butyrate-induced transcript 1                              |
| Axin1       | Axin                                                       |
| Bmp7        | Bone morphogenetic protein 7                               |
| Ccl2        | Chemokine (C-C motif) ligand 2                             |
| Clic3       | Chloride intracellular channel 3                           |
| Cxcr4       | Chemokine (C-X-C motif) receptor 4                         |
| Depdc6      | Expressed sequence R75183                                  |
| Dgkz        | Diacylglycerol kinase zeta                                 |
| Dkk3        | Dickkopf homolog 3 ( <i>Xenopus laevis</i> )               |
| Dvl1        | Dishevelled, dsh homolog 1 ( <i>Drosophila</i> )           |
| Epha6       | Eph receptor A6                                            |
| Fcgr1       | Fc receptor, IgG, high affinity 1                          |
| Fgfr2       | Fibroblast growth factor receptor 2                        |
| Fshr        | Follicle stimulating hormone receptor                      |
| Gnat2       | Guanine nucleotide binding protein, alpha transducing 2    |
| Gnaz        | Guanine nucleotide binding protein, alpha z subunit        |
| Gpr146      | cDNA sequence BC003323                                     |
| Gpr20       | G protein-coupled receptor 20                              |
| Gpr7311     | G protein-coupled receptor 73-like 1                       |
| Grm7        | Glutamate receptor, metabotropic 7                         |
| Hck         | Hemopoietic cell kinase                                    |
| Htr5b       | 5-hydroxytryptamine (serotonin) receptor 5B                |
| Il17r       | Interleukin 17 receptor                                    |
| Ilk         | Integrin linked kinase                                     |
| Itgae       | Integrin, alpha E, epithelial-associated                   |
| Lgr6        | Similar to VTS20631                                        |
| Mapkbp1     | Mitogen activated protein kinase binding protein 1         |
| Myo9b       | Myosin IXb                                                 |
| Oprd1       | Opioid receptor, delta 1                                   |
| Pace4       | Paired basic amino acid cleaving system 4                  |
| Pdzn3       | semaF cytoplasmic domain associated protein 3              |
| Ppm1l       | Protein phosphatase 2a, catalytic subunit, epsilon isoform |
| Prkar2b     | Protein kinase, cAMP dependent regulatory, type II beta    |
| Rab24       | RAB24, member RAS oncogene family                          |
| Rhof        | Ras homolog gene family, member f (in filopodia)           |
| Rnd1        | RIKEN cDNA A830014L09 gene                                 |
| Ror2        | Receptor tyrosine kinase-like orphan receptor 2            |
| Scrib       | Scribble homolog 1 ( <i>Drosophila</i> )                   |
| Slit2       | Slit homolog 2 ( <i>Drosophila</i> )                       |
| Socs3       | Suppressor of cytokine signaling 3                         |
| Spry2       | Sprouty homolog 2 ( <i>Drosophila</i> )                    |
| Tnfrsf21    | Tumor necrosis factor receptor superfamily, member 21      |
| Traf5       | Tnf receptor-associated factor 5                           |
| Wnt7a       | Wingless-related MMTV integration site 7A                  |
